# Supplementary material for: Insights into the evolution, biogeography and natural history of the acorn ants, genus Temnothorax Mayr (hymenoptera: Formicidae)
Source: BMC Evol Biol. 2017 Dec 13;17:250. doi: 10.1186/s12862-017-1095-8 (PMC5729518; doi:10.1186/s12862-017-1095-8)
Supplement: Supplementary file 21 — Biogeographic reconstructions at selected nodes, inferred with BioGeoBEARS using empirical data and sensitivity analyses. (XLSX 34 kb) [file 12862_2017_1095_MOESM21_ESM.xlsx]

## Sheet: Sheet1
Additional table 13. Comparison of BioGeoBEARS biogeoraphic reconstructions at selected nodes among empirical and sensitivity analyses. A = Australasian, C = Caribbean, N = Nearctic, O = Indomalyan, P = Palearctic.
	model/permutation	CF (node 1)	[Vombisidris + LGG + Temnothorax] (node 2)	[LGG + Temnothorax] (node 3)	LGG (node 4)	Temnothorax (node 5)
empirical models	DEC + J	PO	PO	P	P	N
	DIVALIKE + J	O	O	P	P	N
	BAYAREALIKE + J	O	OA	P	P	N
	DEC	PO	PO	P	NP	NP
	DIVALIKE	O	PO	NP	P	N
	BAYAREALIKE	PO	PO	P	P	NP
	model average	PO	PO	P	P	N
model avarged sensitivity analyses	Vomb(A)+Harp(N)+Form(N)	OA	A	CN	N	CN
	Vomb(A)+Harp(N)+Form(P)	OA	A	CN	N	CN
	Vomb(A)+Harp(NP)+Form(P)	PO	PO	P	NP	N
	Vomb(A)+Harp(NP)+Form(NP)	PO	PO	P	P	N
	Vomb(A)+Harp(NP)+Form(N)	PO	A	P	NP	N
	Vomb(A)+Harp(P)+Form(NP)	PO	PO	P	NP	N
	Vomb(A)+Harp(N)+Form(NP)	OA	A	CN	NP	CN
	Vomb(A)+Harp(P)+Form(P)	PO	PO	P	P	N
	Vomb(O)+Harp(N)+Form(N)	PO	PO	P	NP	N
	Vomb(O)+Harp(N)+Form(P)	PO	PO	P	NP	N
	Vomb(O)+Harp(NP)+Form(P)	PO	PO	P	NP	N
	Vomb(O)+Harp(NP)+Form(NP)	PO	PO	P	NP	N
	Vomb(O)+Harp(NP)+Form(N)	PO	PO	P	NP	N
	Vomb(O)+Harp(P)+Form(NP)	PO	PO	P	P	N
	Vomb(O)+Harp(N)+Form(NP)	PO	PO	P	NP	N
	Vomb(O)+Harp(P)+Form(P)	PO	PO	P	P	N
	Vomb(O)+Harp(P)+Form(N)	PO	PO	P	P	N
	Vomb(OA)+Harp(N)+Form(N)	PO	PO	P	NP	N
	Vomb(OA)+Harp(N)+Form(P)	PO	PO	P	NP	N
	Vomb(OA)+Harp(NP)+Form(P)	PO	PO	P	NP	N
	Vomb(OA)+Harp(NP)+Form(NP)	PO	PO	P	NP	N
	Vomb(OA)+Harp(NP)+Form(N)	PO	PO	P	NP	N
	Vomb(OA)+Harp(P)+Form(NP)	PO	PO	P	P	N
	Vomb(OA)+Harp(N)+Form(NP)	PO	PO	P	NP	N
	Vomb(OA)+Harp(P)+Form(P)	PO	PO	P	P	N
	Vomb(OA)+Harp(P)+Form(N)	PO	PO	P	P	N
	average of empirical and sensitivity averages	PO	PO	P	NP	N
